# Supplementary material for: Phenotypic Plasticity and Local Adaptation of Leaf Cuticular Waxes Favor Perennial Alpine Herbs under Climate Change
Source: MDPI journal article supplement (doi:10.3390/plants11010120), 2021-12-31
Supplement: s1 [file s1]

## Supplementary Material

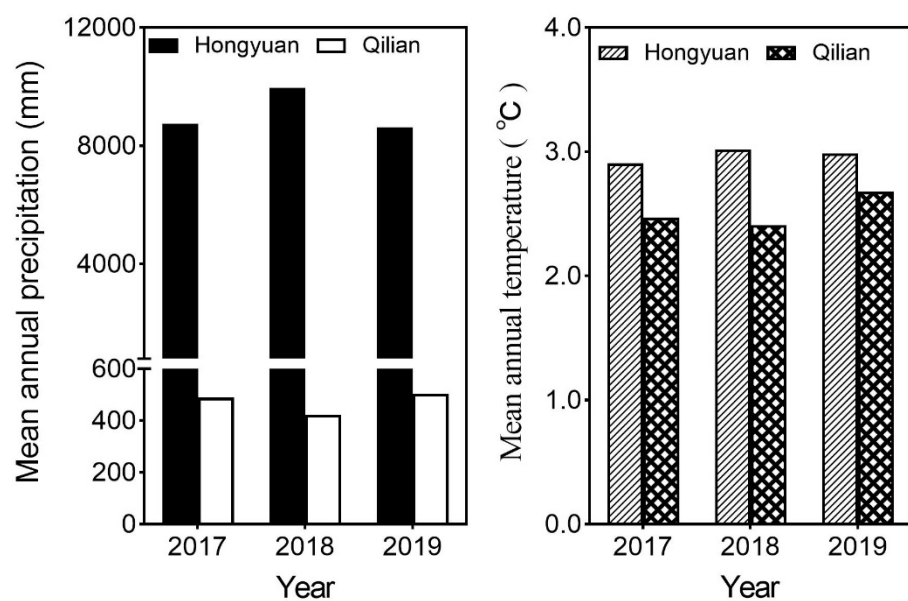

**Figure S1.** Histogram showing the mean annual precipitation and temperature of 2017, 2018 and 2019.

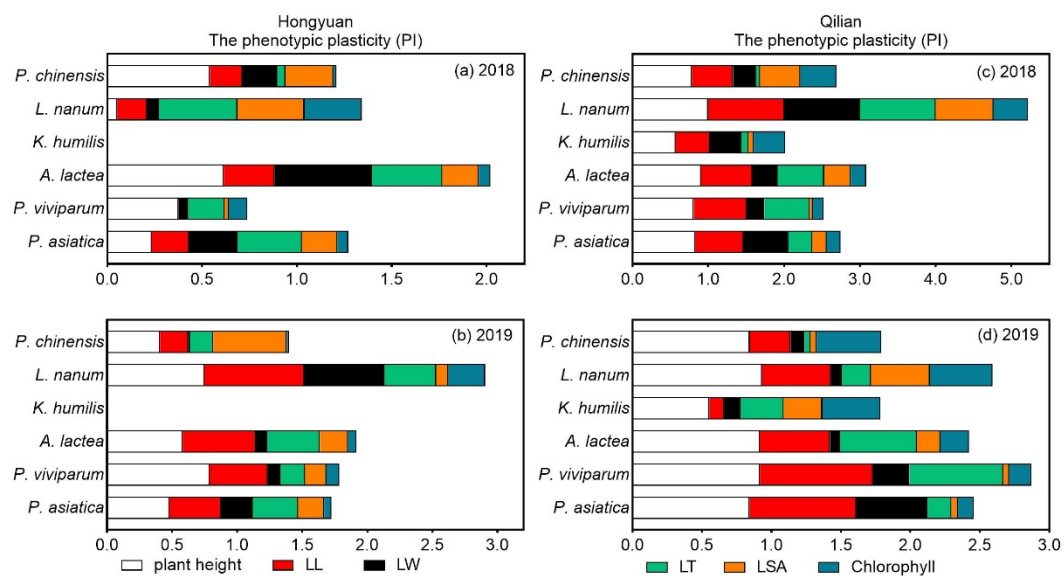

**Figure S2.** (a-d). Histogram showing the extent of phenotypic plasticity indices (PI) of phenotypic and chlorophyll traits

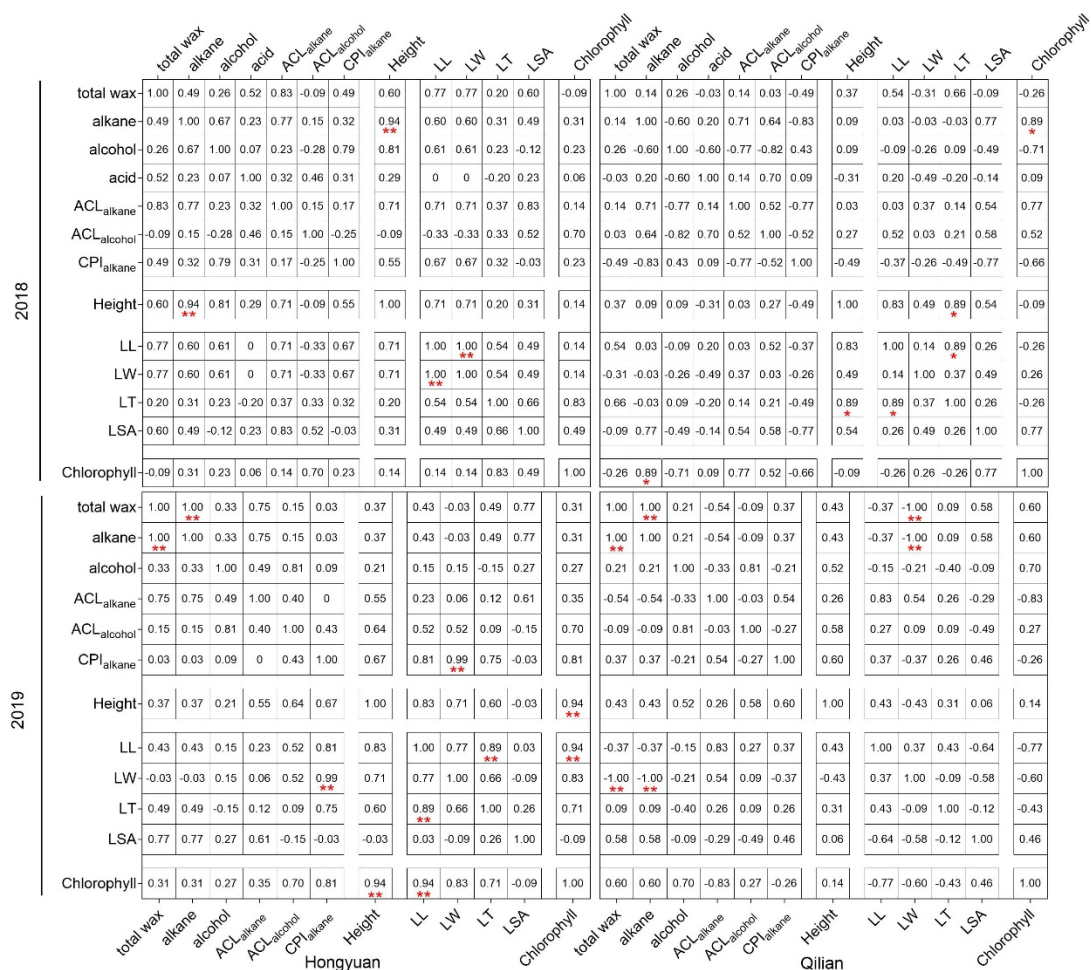

**Figure S3.** Spearman correlation analysis for leaf morphology and wax traits measured of different species transplant to Hongyuan and Qilian

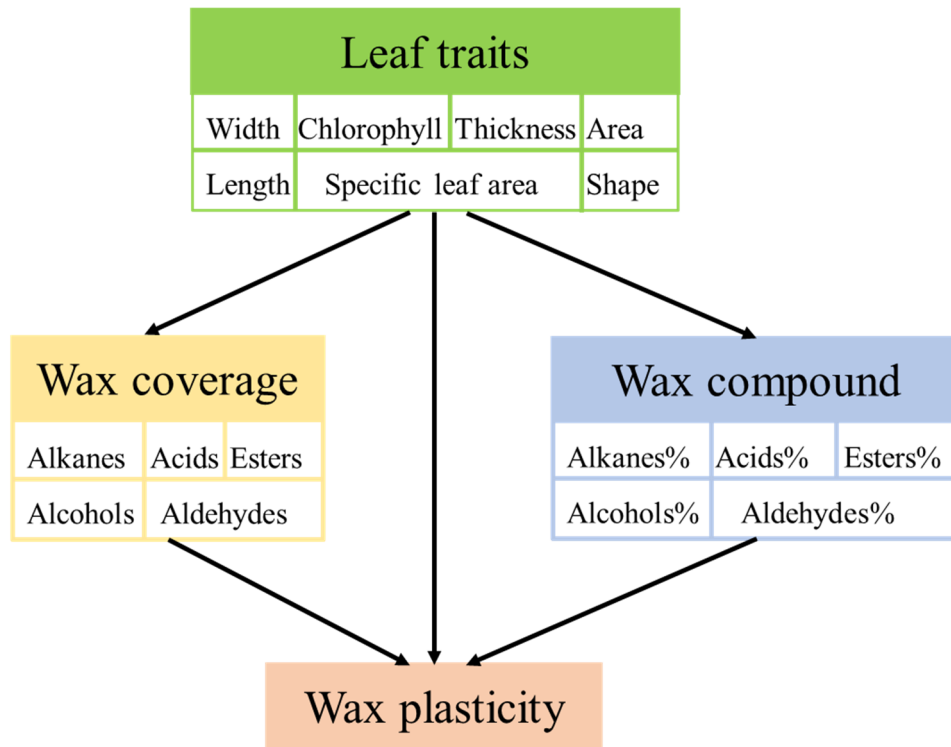

**Figure S4.** The a priori conceptual structural equation model (SEM) of the causal relationships among the leaf traits (i.e., length, width, thickness, area, shape, chlorophyll, specific leaf area), leaf epidermis wax (i.e., alkanes, acids, alcohols, esters, aldehydes), and wax phenotypic plasticity for each of the transplanting types (i.e., QL to HY, and HY to QL). All variables represent the alpine plant leaf temporal measurements of environmental changes. This a priori model was used for the multigroup comparisons among different transplanting types. The single-headed arrows indicate a hypothesized causal direct effect of one variable on another, and an indirect effect of one variable on another was exerted through other one or more variables.

**Table S1.** Soil properties and climate factors of Hongyuan and Qilian.

| Parameters      | Hongyuan                                                | Qilian |
|-----------------|---------------------------------------------------------|--------|
| Soil properties | Total nitrogen ( $\text{g}\cdot\text{kg}^{-1}$ )        | 0.409  |
|                 | Available nitrogen ( $\text{mg}\cdot\text{kg}^{-1}$ )   | 0.035  |
|                 | Total potassium ( $\text{g}\cdot\text{kg}^{-1}$ )       | 1.665  |
|                 | Available potassium ( $\text{mg}\cdot\text{kg}^{-1}$ )  | 188.91 |
|                 | Available phosphorus ( $\text{mg}\cdot\text{kg}^{-1}$ ) | 131.34 |
|                 | Organic matter ( $\text{g}\cdot\text{kg}^{-1}$ )        | 374.02 |
|                 | pH                                                      | 6.21   |
| Altitude (m)    | 3434                                                    | 3701   |

**Table S2.** Summary of principal components analysis (PCA) of finall traits measured in 2019. Three principal components were kept according to the result of Horn's parallel analysis. Abbreviations: LL, leaf length; LW, leaf width; LT, leaf thickness; LSA, leaf specific area.

|                      | Hongyuan |        | Qilian |        |        |
|----------------------|----------|--------|--------|--------|--------|
|                      | PC1      | PC2    | PC1    | PC2    | PC3    |
| Eigenvalues          | 4.152    | 3.464  | 4.322  | 2.205  | 1.485  |
| % of Variance (var.) | 46.13%   | 38.48% | 48.02% | 24.50% | 16.50% |
| Cumulative % of var. | 46.13%   | 84.61% | 48.02% | 72.52% | 89.02% |
| Var.                 | PC1      | PC2    | PC1    | PC2    | PC3    |
| Height               | 0.81     | -0.36  | -0.12  | 0.78   | -0.61  |
| LL                   | 0.97     | -0.21  | -0.76  | 0.50   | -0.34  |
| LW                   | 0.89     | 0.20   | -0.91  | -0.24  | -0.22  |
| LT                   | 0.83     | -0.34  | -0.33  | 0.65   | 0.58   |
| LSA                  | -0.26    | -0.89  | 0.66   | -0.02  | 0.18   |
| Chlorophyll          | 0.92     | 0.10   | 0.89   | -0.39  | -0.14  |
| total wax            | 0.01     | -0.95  | 0.74   | 0.64   | 0.09   |
| alkane               | 0.00     | -0.95  | 0.77   | 0.54   | 0.08   |
| alcohol              | -0.39    | -0.72  | 0.64   | -0.08  | -0.74  |
